# Supplementary material
Source: PubMed Central journal article supplement (PMC2077245)
Supplement: pnas_0708434104_1.pdf [file pnas_0708434104_1.pdf]

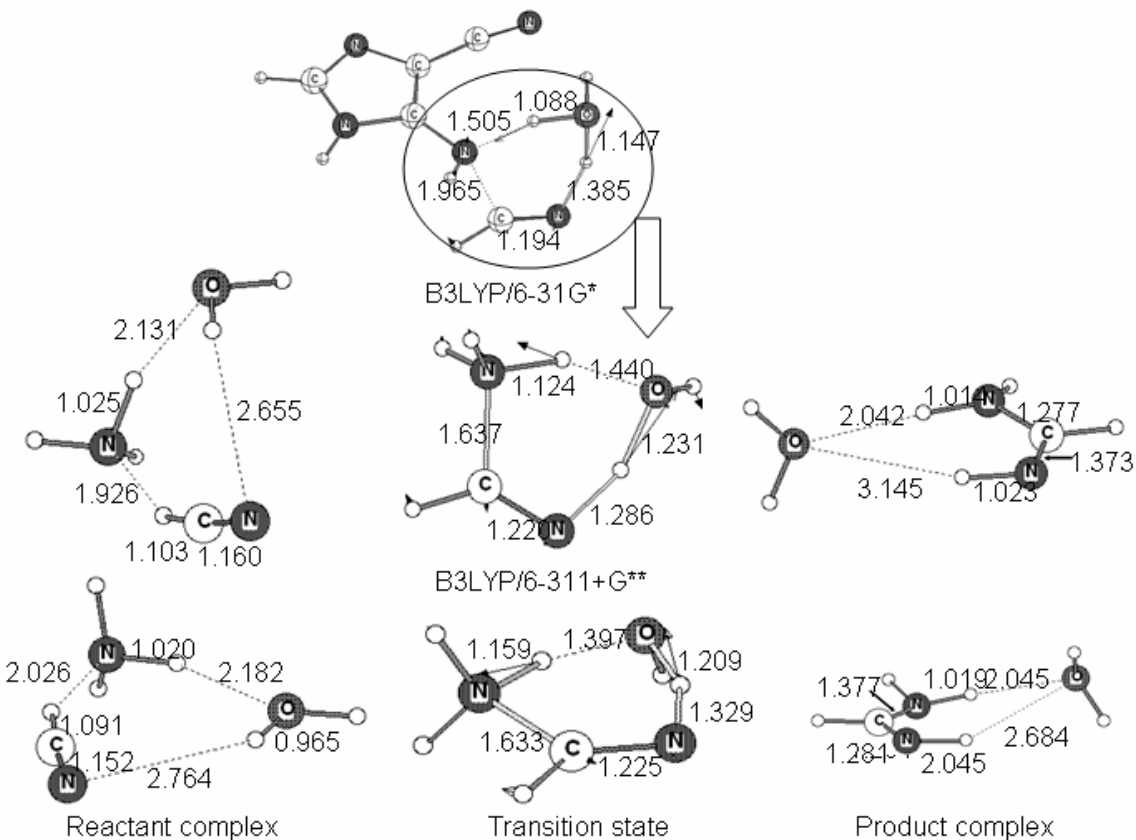

| Level of Theory/Basis set                                                 | Reaction barrier(+ZPVE) (kcal/mol) |
|---------------------------------------------------------------------------|------------------------------------|
| B3LYP/6-31G*                                                              | 31.3 (30.5)                        |
| B3LYP/6-311+G**                                                           | 34.9 (34.6)                        |
| CCSD(T)/aug-ccpVDZ<br>(single point starting from MP2/6-311+G** geometry) | 38.4                               |
| CCSD(T)/aug-ccpVTZ<br>(single point starting from MP2/6-311+G** geometry) | 37.7                               |
