# Supplementary material
Source: PubMed Central journal article supplement (PMC2077245)
Supplement: pnas_0708434104_2.pdf [file pnas_0708434104_2.pdf]

### Justification of the Estimated ZPVE Correction Added to the PCM Single-Point Energy:

The ZPVE corrections to the gas-phase energies are nearly the same with different numbers of solvent molecules, zero, one, or two. For example, the relative energy of the transition structure (TS) for the first step without solvent is 62.9 (without) and 60.4 kcal/mol (with ZPVE correction). The relative energy of the TS with one water molecule is 40.5 (without) and 38.0 kcal/mol (with ZPVE). With two water molecules, the TS relative energy is 39.9 (without) and 37.6 kcal/mol (with ZPVE correction). Consequently, the average ZPVE correction (~2.5 kcal/mol) was added to the PCM single-point energy.

### Coordinates and energies of all compounds computed at B3LYP/6-311+G\*\*

```

HCN
SCF= -93.45449      ZPVE= 10.2 Kcal/mol
Sum of electronic and thermal Free Energies=   -93.45749
3

H  0.0000000  0.0000000  1.5651243
C  0.0000000  0.0000000  0.4983373
N  0.0000000  0.0000000 -0.6507355

C2H2N2
SCF= -186.92409      ZPVE= 24.7 Kcal/mol
Sum of electronic and thermal Free Energies=  -186.91045
6

C -0.7010345 -0.2725596 -0.0036864
C  0.7457894 -0.3144583 -0.0184271
N  1.5080202  0.7007488  0.0115429
H  1.1852588 -1.3106961 -0.0562984
H  0.9751612  1.5732958  0.0470383
N -1.8550130 -0.2351049  0.0087344

C3H3N3
SCF= -280.40402      ZPVE= 38.7 Kcal/mol
Sum of electronic and thermal Free Energies=  -280.37192
9

C  0.8562459 -0.9323890  0.1261996
C -0.1755945  0.0552559  0.5327859
N  0.3508068  1.3242121  1.0230851
H  0.9223483  1.7838204  0.3217362
N  1.7051847 -1.6653887 -0.1393156
H  0.9118995  1.1801976  1.8556947
C -1.1107518  0.2898706 -0.5827061
N -1.8414341  0.4787850 -1.4519050
H -0.7555468 -0.4037017  1.3418411

C4H4N4 (DAMN)
SCF= -373.89828      ZPVE= 52.5 Kcal/mol
Sum of electronic and thermal Free Energies=  -373.847439
12

C  0.2616578  1.6323310  0.0495592
C -0.5846320  0.5040696 -0.1294077
N -1.9428523  0.7408644 -0.3756887
H -2.1742906  1.7054559 -0.5661355
N  0.8976318  2.5885012  0.1872197
C -0.1241489 -0.7728156  0.0041379
N -0.9989609 -1.8562977 -0.1444361
H -2.3512943  0.1129480 -1.0600092
H -1.8974374 -1.7231904  0.3076793

```

C 1.2520363 -1.0584653 0.2180756  
 N 2.3570634 -1.3545045 0.3881907  
 H -0.5966311 -2.7558742 0.0772776

C<sub>4</sub>H<sub>4</sub>N<sub>4</sub> (AICN higher energy isomer)

SCF=-373.92556 ZPVE= 54.2 Kcal/mol  
 Sum of electronic and zero-point Energies= -373.839187  
 12

N 1.724237 0.238272 0.005614  
 C 1.641210 -1.142088 0.005032  
 C 0.443886 0.726688 -0.001440  
 H 2.563291 0.792163 -0.075364  
 N 0.407117 -1.551741 -0.004173  
 C -0.365418 -0.398089 -0.002653  
 N 0.160405 2.079521 -0.083867  
 H 2.519741 -1.768155 0.023876  
 C -1.779618 -0.384403 0.004981  
 N -2.934294 -0.304194 0.015067  
 H -0.832189 2.272002 -0.129822  
 H 0.606539 2.658337 0.617301

C<sub>4</sub>H<sub>4</sub>N<sub>4</sub> (AICN isomer)

SCF= -373.93163 ZPVE= 52.2 Kcal/mol  
 Sum of electronic and thermal Free Energies= -373.876240  
 12

N -0.6781766 1.0854557 -0.8007630  
 C -0.4865136 -0.0654503 -0.0270124  
 C 0.8901503 -0.1180906 0.1849263  
 N 1.6185782 -1.0783325 0.8383477  
 N 1.5020771 0.9415256 -0.4217186  
 C 0.5389991 1.6340536 -0.9992949  
 H 2.5507931 -0.7983021 1.1032485  
 H 1.1368585 -1.6520899 1.5132997  
 C -1.5166132 -0.9120400 0.4016007  
 H 0.6811147 2.5400638 -1.5684078  
 N -2.3511340 -1.6268862 0.7740017  
 H -1.5643145 1.4271535 -1.1385338

C<sub>5</sub>H<sub>5</sub>N<sub>5</sub> (adenine)

SCF= -467.45139 ZPVE= 69.7 Kcal/mol  
 Sum of electronic and thermal Free Energies= -467.37303  
 15

N -0.0600112 1.8172610 -1.8542740  
 C -0.0209635 1.2070087 -0.6477496  
 C -0.0165709 -0.1955525 -0.5119839  
 C 0.0257518 -0.6838289 0.7956995  
 N 0.0620482 0.0409382 1.9172120  
 C 0.0535540 1.3488228 1.6547490  
 N 0.0149520 1.9611166 0.4619945  
 N -0.0463733 -1.2286168 -1.4328749  
 C -0.0226933 -2.3125196 -0.7011880  
 N 0.0211491 -2.0535728 0.6534849  
 H -0.0613159 2.8226452 -1.8946311  
 H -0.0873719 1.2731578 -2.6996847  
 H 0.0814369 2.0087435 2.5162921  
 H -0.0350546 -3.3226220 -1.0831358  
 H 0.0454747 -2.7253907 1.4052004

**Uncatalyzed pathway: first step N-C bond formation**

Reactant

15

|   |            |            |            |
|---|------------|------------|------------|
| N | -0.4493914 | -1.7862208 | 0.4032184  |
| C | -1.4019533 | -1.8837493 | -0.5055676 |
| C | -0.3272923 | -0.4570006 | 0.6729776  |
| N | -1.9094203 | -0.6787649 | -0.8430704 |
| C | -1.2274648 | 0.2790655  | -0.0889903 |
| N | 0.6480861  | 0.0059444  | 1.5463203  |
| H | -1.7522595 | -2.8057325 | -0.9434498 |
| C | -1.4816117 | 1.6578820  | -0.1374003 |
| C | 3.3967314  | 0.2002681  | -0.3026206 |
| N | -1.6724384 | 2.8011366  | -0.1495033 |
| N | 4.3528566  | 0.2497230  | -0.9396782 |
| H | 2.5043764  | 0.1544944  | 0.2986871  |
| H | 0.4500175  | 0.9062197  | 1.9652479  |
| H | 0.8977537  | -0.6865256 | 2.2423896  |
| H | -2.6381924 | -0.4899779 | -1.5142755 |

Product

15

|   |           |           |           |
|---|-----------|-----------|-----------|
| N | -1.002360 | -1.769248 | -0.002491 |
| C | -2.224580 | -1.269068 | 0.008381  |
| C | -0.160474 | -0.692050 | -0.009063 |
| N | -2.225153 | 0.080142  | 0.009353  |
| C | -0.889454 | 0.499891  | -0.000577 |
| N | 1.198609  | -0.928428 | -0.024598 |
| H | -3.135027 | -1.852582 | 0.016635  |
| C | -0.527274 | 1.858864  | 0.000747  |
| C | 2.233483  | -0.001124 | -0.021458 |
| N | -0.232415 | 2.988195  | 0.003489  |
| N | 3.484154  | -0.241097 | 0.026910  |
| H | 1.897168  | 1.034592  | -0.068187 |
| H | 3.677520  | -1.249038 | 0.075125  |
| H | 1.437369  | -1.913599 | 0.008638  |
| H | -3.027076 | 0.694604  | 0.010981  |

**Pathway catalyzed by one explicit water: first step**

Reactant

18

|   |            |            |            |
|---|------------|------------|------------|
| N | -1.1426300 | -1.7428920 | 0.9238350  |
| C | -2.1733660 | -1.8344800 | 0.1058290  |
| C | -0.5618930 | -0.5347000 | 0.6666060  |
| N | -2.3039310 | -0.7445850 | -0.6798220 |
| C | -1.2637470 | 0.1269020  | -0.3417500 |
| N | 0.5917270  | -0.1443250 | 1.3115350  |
| H | -2.8501680 | -2.6733940 | 0.0501060  |
| C | -1.0630750 | 1.3902070  | -0.9086750 |
| C | 3.1294120  | -1.2107470 | -0.4746790 |
| N | -0.8447700 | 2.4478950  | -1.3331390 |
| N | 4.0215950  | -1.5835410 | -1.0969180 |
| H | 1.9451740  | 3.2602690  | 1.0085700  |
| H | 2.2899140  | -0.8672260 | 0.1109710  |
| O | 1.1087840  | 2.7850630  | 1.0304670  |
| H | 0.7712030  | 0.8599930  | 1.3515210  |
| H | 0.7108250  | -0.6088750 | 2.2027980  |
| H | 0.6104570  | 3.0803320  | 0.2553800  |
| H | -3.0056010 | -0.5825490 | -1.3855110 |

Product

18

|   |           |           |           |
|---|-----------|-----------|-----------|
| N | 0.310063  | -1.683648 | -0.018735 |
| C | -0.847055 | -2.322239 | -0.019093 |
| C | 0.010119  | -0.340538 | -0.007828 |
| N | -1.890581 | -1.473475 | -0.005150 |
| C | -1.377594 | -0.168562 | 0.002188  |
| N | 1.045346  | 0.561684  | -0.008922 |
| H | -0.964026 | -3.396994 | -0.029420 |
| C | -2.218342 | 0.958671  | 0.017267  |
| C | 0.947655  | 1.947673  | 0.001347  |
| N | -2.932706 | 1.881479  | 0.031208  |
| N | 1.910077  | 2.783382  | -0.026577 |
| H | 2.818609  | 2.306569  | -0.069449 |
| H | -0.073200 | 2.327139  | 0.041667  |
| O | 3.146514  | -1.392366 | -0.051240 |
| H | 3.466339  | -1.571745 | 0.846401  |
| H | 1.975618  | 0.123161  | -0.037928 |
| H | 2.292962  | -1.875206 | -0.102558 |
| H | -2.872504 | -1.709978 | -0.004852 |

**Pathway catalyzed by two explicit NH<sub>3</sub>: Geometry for the stationary points**

Reactant 1

SCF energy -580.58826 ZPVE=112.1 kcal/mol

23

|   |            |            |            |
|---|------------|------------|------------|
| N | 0.7775208  | -2.3346511 | -0.3626348 |
| C | 2.0126452  | -1.9516455 | -0.0562079 |
| C | 0.0531576  | -1.1824480 | -0.4524746 |
| N | 2.1401451  | -0.6187926 | 0.0579651  |
| C | 0.8766311  | -0.0791852 | -0.1955139 |
| N | -1.3074960 | -1.2007819 | -0.7058730 |
| H | 2.8446359  | -2.6277006 | 0.0901917  |
| C | 0.6281035  | 1.3021561  | -0.1911079 |
| C | -3.4157834 | -0.4168815 | 1.4647668  |
| N | 0.4242729  | 2.4540935  | -0.1966095 |
| N | -4.2799061 | 0.0720007  | 2.0617859  |
| H | -3.2598344 | 1.5560932  | -0.8392808 |
| H | -2.6137430 | -0.8446117 | 0.8650003  |
| N | -2.4980519 | 1.4046861  | -1.5004759 |
| H | -1.6947882 | -0.3488307 | -1.1481828 |
| H | -1.5883582 | -2.0584154 | -1.1705363 |
| H | -1.7783961 | 2.0907635  | -1.2701847 |
| H | 2.9653133  | -0.0334680 | 0.2888589  |
| N | 3.9813076  | 1.5101290  | 0.6510234  |
| H | 3.2974694  | 2.2564988  | 0.5187694  |
| H | 4.3312451  | 1.6033431  | 1.6036185  |
| H | -2.8588887 | 1.6500669  | -2.4213549 |
| H | 4.7622736  | 1.7174988  | 0.0300577  |

Product 1

SCF energy -580.59733 ZPVE= 114.8 kcal/mol

23

|   |            |            |            |
|---|------------|------------|------------|
| N | 0.5380686  | -1.6804782 | -0.0410001 |
| C | -0.7251067 | -2.0896491 | -0.0318143 |
| C | 0.4834928  | -0.3102324 | -0.0132453 |
| N | -1.6020868 | -1.0762910 | 0.0002091  |
| C | -0.8545185 | 0.1058812  | 0.0132251  |
| N | 1.6601053  | 0.4033133  | -0.0151099 |
| H | -1.0333108 | -3.1264912 | -0.0481079 |
| C | -1.4980677 | 1.3557061  | 0.0468616  |
| C | 1.7932651  | 1.7802515  | 0.0096564  |
| N | -2.0951499 | 2.3601501  | 0.0749637  |
| N | 2.8830075  | 2.4480375  | 0.0078792  |
| H | 3.6942375  | 1.8183341  | -0.0151924 |
| H | 0.8504380  | 2.3280410  | 0.0329253  |
| N | 3.6424627  | -1.7310823 | -0.0822394 |
| H | 4.1857014  | -2.0341820 | 0.7243269  |
| H | 2.5145098  | -0.1814511 | -0.0381542 |

H 2.7679333 -2.2619077 -0.0808659  
 H -2.6420489 -1.0780593 0.0143512  
 N -4.3901460 -0.4187670 0.0535579  
 H -4.2205910 0.5882391 0.0727997  
 H -4.9766355 -0.5995702 -0.7600360  
 H 4.1647444 -2.0040541 -0.9130023  
 H -4.9531978 -0.6348192 0.8750304

Product 2

SCF energy -580.59938 ZPVE= 114.6 kcal/mol

23

N 0.5470162 -1.6943651 -0.0404760  
 C -0.7162506 -2.1011067 -0.0310701  
 C 0.4963951 -0.3235140 -0.0131450  
 N -1.5933896 -1.0877580 0.0008392  
 C -0.8439658 0.0937095 0.0133333  
 N 1.6671682 0.3933278 -0.0153067  
 H -1.0254343 -3.1377755 -0.0469963  
 C -1.4844931 1.3440942 0.0463891  
 C 1.7809672 1.7651506 0.0097643  
 N -2.0733300 2.3542194 0.0740813  
 N 2.9301031 2.3280243 0.0049642  
 H 0.8219689 2.2923110 0.0331473  
 N 3.6311865 -1.7274761 -0.0833220  
 H 4.1937086 -1.9888832 0.7239016  
 H 2.5389532 -0.1725440 -0.0382343  
 H 2.7901664 -2.3069300 -0.0830496  
 H -2.6323039 -1.0893952 0.0152361  
 N -4.3846968 -0.4227755 0.0522323  
 H -4.2100984 0.5833359 0.0693389  
 H -4.9716697 -0.6025610 -0.7611973  
 H 4.1713117 -1.9571540 -0.9151196  
 H -4.9491524 -0.6342614 0.8739328  
 H 2.8082300 3.3414793 0.0263250

Product 3

SCF energy -580.59836 ZPVE=115.1 kcal/mol

23

N -1.0817155 -1.4578182 -0.0000462  
 C 0.0541714 -2.1400721 -0.0000797  
 C -0.7195080 -0.1316085 0.0000036  
 N 1.1334007 -1.3449388 -0.0000021  
 C 0.6762144 -0.0208997 -0.0000097  
 N -1.7389206 0.8003702 0.0000086  
 H 0.1236729 -3.2196977 -0.0001250  
 C 1.6640474 0.9930286 -0.0000004  
 N 2.6514957 1.6166151 0.0000114  
 N -0.4657267 2.7434386 -0.0000370  
 C -1.6040669 2.1620536 -0.0000196  
 H -2.5795586 2.6635491 -0.0000161  
 H 2.1453217 -1.5903889 0.0000145  
 H -0.5737341 3.7569434 -0.0000450  
 H -2.6873908 0.3931962 0.0000270  
 N -4.1023932 -0.9022778 0.0000566  
 H -3.3271185 -1.5711766 0.0002540  
 H -4.6758380 -1.0984025 0.8188047  
 N 3.9982311 -1.4012399 0.0000522  
 H 4.0163345 -0.3786824 0.0000600  
 H 4.5241267 -1.7053736 -0.8179998  
 H -4.6756646 -1.0986331 -0.8187594  
 H 4.5240990 -1.7053904 0.8181158

Product 4

SCF energy -580.59952 ZPVE= 117.0 kcal/mol

23

N -1.2315914 -1.5956975 0.0000142  
 C -0.0202466 -2.2091646 0.0000774  
 C -0.8641358 -0.2996013 0.0000155  
 N 1.0649727 -1.4137775 0.0000118  
 C 0.5279618 -0.1590068 0.0000143  
 N -1.7296316 0.7922223 0.0000027  
 H 0.0635440 -3.2898551 0.0001202  
 C 1.1565036 1.1484047 -0.0000070  
 N 2.3464128 1.5960941 -0.0000353  
 N 0.1192417 2.1738073 -0.0000174  
 C -1.2040224 1.9990641 -0.0000126  
 H -1.8512494 2.8676290 -0.0000266  
 H 3.1605320 -1.4002459 -0.0000190  
 H 0.5011316 3.1135034 -0.0000340  
 H -2.7608702 0.5795373 -0.0000000  
 N -4.0974276 -0.6243806 -0.0000034  
 H -3.3977278 -1.3790830 -0.0001385  
 H -4.6888885 -0.7553622 0.8192222  
 N 4.0811468 -0.9451714 -0.0000317  
 H 3.0412143 0.8310009 -0.0000429  
 H 4.5865622 -1.2859122 -0.8166198  
 H -4.6890405 -0.7551943 -0.8191458  
 H 4.5865642 -1.2858713 0.8165722

Product 5

SCF energy -580.62037 ZPVE= 116.9 kcal/mol

23

C 1.1862486 1.2119970 0.1833399  
 N 2.2556706 0.2557368 0.2283003  
 C 2.1439459 -1.0940289 0.1387414  
 N 1.0249117 -1.7483918 -0.0052626  
 C -0.0543404 -0.8984977 -0.0574632  
 C -0.0687720 0.4889857 0.0223635  
 N -1.3627014 0.9544738 -0.0726485  
 C -2.1005299 -0.1319352 -0.2059371  
 N -1.3616775 -1.2823031 -0.2034099  
 N 1.5067004 2.4403155 0.2856031  
 H -1.6425740 -2.2751120 -0.2880723  
 H -3.1772635 -0.1412933 -0.3082292  
 H 3.0789460 -1.6465765 0.1947074  
 H -1.6266591 4.4757320 0.9279795  
 H 0.6838654 3.0587846 0.2441787  
 N -1.1749429 4.0436622 0.1234510  
 H -1.5569111 3.0982578 0.0313330  
 N -1.1021130 -4.1036839 -0.3439265  
 H -1.1583915 -4.6468376 -1.2040282  
 H -0.1271354 -3.8108457 -0.2348597  
 H -1.4718875 4.5716971 -0.6956853  
 H -1.3117748 -4.7417695 0.4221328  
 H 3.1695371 0.6801721 0.3395278

Product5 isomer

SCF energy -580.62934 ZPVE= 117.4 kcal/mol

23

C 0.2921620 0.9146654 -1.1484508  
 N 1.5214850 0.4801912 -0.5961963  
 C 1.6474487 -0.3601815 0.4609225  
 N 0.6668844 -0.9016712 1.1368992  
 C -0.5535971 -0.5159231 0.6459012  
 C -0.8131332 0.3333973 -0.4231455  
 N -2.1685501 0.4797159 -0.6138347  
 C -2.7079131 -0.2704478 0.3265667  
 N -1.7802909 -0.8979308 1.1202009  
 N 0.3173764 1.7175539 -2.1577462  
 H -1.8904505 -1.5379901 1.9244264  
 H -3.7706586 -0.3992838 0.4832491  
 H 2.6714626 -0.5852447 0.7489385  
 H 2.3721110 2.1139449 -2.6459738

H -0.6432490 1.9311708 -2.4310663  
 N 3.3206007 1.8686665 -2.3329139  
 H 3.8081533 1.4562345 -3.1269359  
 N -0.9931238 -2.5959657 3.2587659  
 H -1.0002896 -3.6141864 3.2247432  
 H -0.0947591 -2.2876398 2.8756984  
 H 3.8031200 2.7374607 -2.1078525  
 H -1.0052584 -2.3342845 4.2433252  
 H 2.3693429 0.8568369 -1.0655409

Product 6

SCF energy -580.6444 ZPVE= 117.0 kcal/mol

23

C 0.3904778 0.7279752 -1.0844384  
 N 1.6058574 0.3517178 -0.6138063  
 C 1.6613613 -0.4095615 0.4906999  
 N 0.6615501 -0.8802330 1.2391079  
 C -0.5345427 -0.4933679 0.7518225  
 C -0.7577246 0.2944396 -0.3806815  
 N -2.1115508 0.4952247 -0.5871632  
 C -2.6771943 -0.1605029 0.4031991  
 N -1.7830060 -0.7783406 1.2457500  
 N 0.3186156 1.4907755 -2.1902184  
 H -1.9231921 -1.3538198 2.0923003  
 H -3.7449940 -0.2270206 0.5677217  
 H 2.6650543 -0.6774744 0.8170652  
 H 1.1816469 1.7807303 -2.6666207  
 H -0.5906122 1.7641297 -2.5301298  
 N 3.1342529 1.8399634 -2.8760150  
 H 3.6432687 1.3092883 -3.5811712  
 N -1.0185612 -2.3470088 3.4808134  
 H -1.0504242 -3.3646944 3.5193876  
 H -0.1243799 -2.0899628 3.0501428  
 H 3.7016442 2.6568108 -2.6551463  
 H -0.9919187 -2.0178805 4.4447375  
 H 3.0895370 1.2613067 -2.0311763

### Pathway catalyzed by two explicit H<sub>2</sub>O: Geometry for the stationary points

Reactant 1

SCF energy -620.33657 ZPVE= 95.9kcal/mol

21

N 0.7987381 -2.4315784 -0.4717619  
 C 2.0277950 -2.0495572 -0.1449131  
 C 0.0590670 -1.2870652 -0.5117988  
 N 2.1338919 -0.7208441 0.0338200  
 C 0.8645732 -0.1858353 -0.1986522  
 N -1.2990186 -1.3071556 -0.7707148  
 H 2.8694065 -2.7192004 -0.0295217  
 C 0.5976061 1.1885423 -0.1382070  
 C -3.2336664 -0.1519412 1.3908435  
 N 0.3752568 2.3368830 -0.0999092  
 N -3.9441632 0.6491930 1.8332887  
 H -3.0556561 1.5223018 -0.5798627  
 H -2.5608235 -0.8534715 0.9100390  
 O -2.4063640 1.3807758 -1.2883512  
 H -1.6847182 -0.4359114 -1.1530288  
 H -1.5777568 -2.1349985 -1.2868003  
 H -1.6899694 2.0064214 -1.0835266  
 H 2.9380126 -0.1371356 0.2810408  
 O 3.6336104 1.6093142 0.6665475  
 H 3.0045204 2.2236455 0.2509864  
 H 3.5938287 1.8372825 1.6084085

## Product 1

SCF energy -620.34791 ZPVE= 98.8 kcal/mol

21

|   |            |            |            |
|---|------------|------------|------------|
| N | 0.6281384  | -1.6610750 | 0.0011135  |
| C | -0.6101962 | -2.1306489 | -0.0152692 |
| C | 0.5214249  | -0.2946530 | 0.0076830  |
| N | -1.5224884 | -1.1501397 | -0.0186070 |
| C | -0.8279745 | 0.0634801  | -0.0039940 |
| N | 1.6675636  | 0.4640419  | 0.0223764  |
| H | -0.8734754 | -3.1768508 | -0.0254836 |
| C | -1.5238144 | 1.2810654  | 0.0014817  |
| C | 1.7453469  | 1.8488051  | 0.0246454  |
| N | -2.1712976 | 2.2438059  | 0.0073326  |
| N | 2.8028635  | 2.5553783  | 0.0207334  |
| H | 3.6487234  | 1.9802515  | 0.0093765  |
| H | 0.7813592  | 2.3542318  | 0.0326232  |
| O | 3.4528851  | -1.8383826 | -0.0572337 |
| H | 3.9754419  | -2.3487638 | 0.5676630  |
| H | 2.5332452  | -0.0788560 | 0.0218635  |
| H | 2.5403107  | -2.1831283 | -0.0142744 |
| H | -2.5411460 | -1.2077622 | -0.0333174 |
| O | -4.2608495 | -0.3210695 | -0.0048368 |
| H | -4.1401920 | 0.6376796  | 0.0240903  |
| H | -5.1227294 | -0.4735562 | -0.4039013 |

## Product 2

SCF energy -620.35019 ZPVE= 98.8 kcal/mol

21

|   |            |            |            |
|---|------------|------------|------------|
| N | -0.9448683 | -0.2384849 | 1.4981009  |
| C | -2.0665053 | -0.1853640 | 0.7967007  |
| C | 0.0790047  | -0.0822846 | 0.6007378  |
| N | -1.8390412 | -0.0070184 | -0.5112215 |
| C | -0.4530679 | 0.0665233  | -0.6837143 |
| N | 1.3747452  | -0.0923062 | 1.0494521  |
| H | -3.0583001 | -0.2731024 | 1.2123249  |
| C | 0.0985921  | 0.2622250  | -1.9571073 |
| C | 2.5111026  | 0.0153392  | 0.2746702  |
| N | 0.4850211  | 0.4263873  | -3.0393952 |
| N | 3.6663429  | -0.0211050 | 0.8084492  |
| H | 2.3186204  | 0.1282540  | -0.7941229 |
| O | 0.6046765  | -0.3374472 | 3.8658406  |
| H | 1.4968425  | -0.1907035 | 2.0605862  |
| H | -0.2150092 | -0.3967833 | 3.3413848  |
| H | -2.5014366 | 0.0714401  | -1.2826909 |
| O | -2.8265414 | 0.3605388  | -3.1745586 |
| H | -1.9911108 | 0.4740486  | -3.6472679 |
| H | -3.4713394 | 0.0726168  | -3.8276364 |
| H | 4.3885665  | 0.0727167  | 0.0985914  |
| H | 0.5979296  | -1.0741615 | 4.4831543  |

## Product 3

SCF energy -620.35103 ZPVE= 99.5kcal/mol

21

|   |            |            |            |
|---|------------|------------|------------|
| N | 0.9796877  | -1.5424473 | -0.0163168 |
| C | -0.2010565 | -2.1363945 | 0.0113008  |
| C | 0.7327466  | -0.1916570 | -0.0201441 |
| N | -1.2056854 | -1.2503679 | 0.0249754  |
| C | -0.6437140 | 0.0320258  | 0.0048240  |
| N | 1.8236560  | 0.6527901  | -0.0478033 |
| H | -0.3572978 | -3.2037622 | 0.0233538  |
| C | -1.5426050 | 1.1206625  | -0.0061872 |
| N | -2.4788051 | 1.8044238  | -0.0194294 |
| N | 0.7074618  | 2.6765984  | 0.0715222  |



C 1.7977313 2.0227482 0.0072087  
 H 2.8029232 2.4533889 -0.0115672  
 H -2.2143087 -1.4167908 0.0496627  
 H 0.8664504 3.6791820 0.1042963  
 H 2.7249503 0.1779911 -0.0757560  
 O 3.7967086 -1.4843321 -0.0161172  
 H 2.9031529 -1.8827999 -0.0294288  
 H 4.3212767 -1.9544047 -0.6701507  
 O -4.0386524 -0.8237379 0.0153962  
 H -3.9439663 0.1414873 -0.0183253  
 H -4.8104492 -1.0010206 0.5610322

## Product 4

SCF energy -620.32589 ZPVE= 99.3 kcal/mol

21

N -1.1219009 -1.3931561 0.0165569  
 C -0.0197794 -2.1466904 0.0233250  
 C -0.8035301 -0.0217261 0.0043222  
 N 1.0297622 -1.3473085 0.0186770  
 C 0.6105501 -0.0025959 0.0074432  
 N -1.8144925 0.8396881 -0.0101289  
 H 0.0083555 -3.2227162 0.0295468  
 C 1.6355869 0.9638532 -0.0085583  
 N 2.6825377 1.4682934 -0.0205524  
 N -0.3470157 2.6630117 -0.0064275  
 C -1.5358592 2.1771737 -0.0224302  
 H -2.4384398 2.7966583 -0.0471805  
 H 2.0225800 -1.6145810 0.0259583  
 H -2.1036877 -1.6965207 0.0228573  
 O 3.8327770 -1.2806582 -0.0407805  
 H 3.8485319 -0.3076630 -0.0631783  
 H -0.3467138 3.6797746 -0.0220261  
 H 4.5917845 -1.5565350 0.4812438  
 O -3.8289793 -1.0193410 -0.0746655  
 H -3.3652823 -0.1414582 -0.0485309  
 H -4.5715549 -0.9707517 0.5333904

## Product 5

SCF energy -620.37754 ZPVE= 101.5 kcal/mol

21

N -1.3101087 -1.3591847 0.1211849  
 C -2.1318239 -0.2685160 0.0555463  
 C -0.0258804 -0.8863510 0.0626771  
 N -1.4593916 0.8593370 -0.0417881  
 C -0.1333162 0.4901795 -0.0375414  
 N 1.1159393 -1.6442991 0.0998092  
 H -3.2068421 -0.3534750 0.0842945  
 C 1.0693315 1.3020181 -0.1118800  
 N 1.2848812 2.5511151 -0.1990443  
 N 2.2094514 0.4362689 -0.0719633  
 C 2.1930115 -0.9146313 0.0288893  
 H 3.1637095 -1.3983614 0.0500158  
 H -1.8258505 2.7435824 -0.1580224  
 H -1.5435449 -2.3475138 0.1998776  
 O -1.6575313 3.7060645 -0.1932349  
 H 0.4170128 3.0906972 -0.2144847  
 H 3.0960998 0.9226629 -0.1157726  
 H -2.1386454 4.0335030 -0.9580799  
 O -0.4390525 -4.0222049 0.3807808  
 H 0.3891744 -3.5150301 0.2822119  
 H -0.2917781 -4.8857990 -0.0139444

## Product 5 isomer

SCF energy -620.38559 ZPVE=101.8 kcal/mol

21

C 0.3517585 0.8826537 -1.0991348  
N 1.5455358 0.3818300 -0.5283882  
C 1.6129156 -0.4752058 0.5195344  
N 0.5876852 -0.9719995 1.1554753  
C -0.6012861 -0.5275102 0.6468596  
C -0.7944479 0.3456081 -0.4126459  
N -2.1345866 0.5586290 -0.6291251  
C -2.7358638 -0.1715794 0.2827919  
N -1.8547630 -0.8540741 1.0860882  
N 0.4384143 1.6987258 -2.0898505  
H -2.0335483 -1.4849758 1.8648123  
H -3.8042261 -0.2495953 0.4142553  
H 2.6141489 -0.7509557 0.8312152  
H 2.2273901 2.0519858 -2.4807359  
H -0.4861660 1.9853742 -2.4001743  
O 3.1784815 1.8967684 -2.2645358  
H 3.6417062 1.7751291 -3.0977110  
O -0.8061776 -2.4668182 3.1512581  
H -0.6067113 -3.3453084 3.4854276  
H -0.0149983 -2.1555474 2.6717918  
H 2.4095169 0.7187152 -0.9664885

Product 6

SCF energy -620.40083 ZPVE= 101.4 kcal/mol

21

C 0.5024850 0.8573444 -0.9415640  
N 1.6319625 0.3440734 -0.4001523  
C 1.5344245 -0.5654677 0.5796856  
N 0.4300314 -1.0681148 1.1271335  
C -0.6826310 -0.5495730 0.5784302  
C -0.7349175 0.4000668 -0.4411904  
N -2.0430307 0.7108959 -0.7586932  
C -2.7546763 -0.0349140 0.0515274  
N -1.9906306 -0.8204814 0.8845522  
N 0.5980050 1.7690243 -1.9245842  
H -2.2758564 -1.4835453 1.6019097  
H -3.8336246 -0.0554665 0.0883185  
H 2.4767908 -0.9335860 0.9728889  
H 3.1494038 1.2052443 -1.2470294  
H 1.5139030 2.0817135 -2.2320587  
H -0.2420767 2.1710221 -2.3060398  
O 3.5122014 1.8692228 -1.8701422  
H 4.2375653 1.4447864 -2.3363783  
O -1.1682481 -2.5989901 2.9069147  
H -1.0142530 -3.4991476 3.2054409  
H -0.3359495 -2.2854039 2.4996433

**Full citation for text ref. 21**

M. J. Frisch, G. W. Trucks, H. B. Schlegel, G. E. Scuseria, M. A. Robb, J. R. Cheeseman, V. G. Zakrzewski, J. A. Montgomery, Jr., R. E. Stratmann, J. C. Burant, S. Dapprich, J. M. Millam, A. D. Daniels, K. N. Kudin, M. C. Strain, O. Farkas, J. Tomasi, V. Barone, M. Cossi, R. Cammi, B. Mennucci, C. Pomelli, C. Adamo, S. Clifford, J. Ochterski, G. A. Petersson, P. Y. Ayala, Q. Cui, K. Morokuma, D. K. Malick, A. D. Rabuck, K. Raghavachari, J. B. Foresman, J. Cioslowski, J. V. Ortiz, A. G. Baboul, B. B. Stefanov, G. Liu, A. Liashenko, P. Piskorz, I. Komaromi, R. Gomperts, R. L. Martin, D. J. Fox, T. Keith, M. A. Al-Laham, C. Y. Peng, A. Nanayakkara, M. Challacombe, P. M. W. Gill, B. Johnson, W. Chen, M. W. Wong, J. L. Andres, C. Gonzalez, M. Head-Gordon, E. S. Replogle, and J. A. Pople, (1998) GAUSSIAN 98 (Gaussian, Pittsburgh), Revision A.9.
